# Supplementary material
Source: Elsevier journal article supplement (https://www.sciencedirect.com/science/article/pii/S2173578615000803)
Supplement: mmc1 [file S2173578615000803:mmc1.docx]

**ANEXO. Material suplementario**.

Artículos excluidos durante el proceso de revisión y causa de exclusión por orden alfabético del primer autor

| **Primer Autor** | **Referencia** | **Causa exclusión** |
| --- | --- | --- |
| Aneja S, | Oncology 2012;26(6):512-8 | Revisión no sistemática |
| Anwar M, | Radiat Oncol 2014;9:42 | Seriecasos/cohorte/ENA |
| Arcangeli G, | Int J Radiat Oncol Biol Phys 2010 ;78(1):11-8 | Duplicado |
| Arcangeli G, | Int J Radiat Oncol Biol Phys 2011;79(4):1013-21 | Duplicado |
| Arcangeli S, | Int J Radiat Oncol Biol Phys 2009;73(1):39-45 | Duplicado |
| Arcangeli S | Int J Radiat Oncol Biol Phys 2012 ;84(5):1172-8 | Incluidoen RS |
| Barra S, | Biomed Res Int 2014;2014:541847 | Control diferente/αβ |
| Boissier R | Prog Urol 2010;22(6):326-30 | Revisión no sistemática |
| Cho LC, | Prostate Cancer 2013;2013:103547 | Revisión no sistemática |
| Coote JH, | Int J Radiat Oncol Biol Phys 2009;74(4):1121-7 | Seriecasos/cohorte/ENA |
| Dearnaley D | Lancet Oncol 2012;13(1):43-54 | Incluidoen RS |
| Di SM, | BJU Int 2010;106(10):1458-62 | Seriecasos/cohorte/ENA |
| Fonteyne V | Int J Radiat Oncol Biol Phys 2009;75(4):1013-20 | Seriecasos/cohorte/ENA |
| Fonteyne V | Int J Radiat Oncol Biol Phys 2012;84(4):e483-90 | Seriecasos/cohorte/ENA |
| Guckenberger M | Strahlenther Onkol 2014;190(1):48-53 | Seriecasos/cohorte/ENA |
| Hamilton J | Cancer Biol Ther 2009;8(9):774-6 | Carta/comentario/abstract |
| Jereczek-Fossa B | Urol Oncol 2011;29(5):523-32 | Seriecasos/cohorte/ENA |
| Kim YJ, | Acta Oncol 2013;52(3):477-85 | Control diferente/αβ |
| Kuban D | Int J Radiat Oncol Biol Phys 2007;70(1):67-74 | Incluidoen RS |
| Leborgne F, | Int J Radiat Oncol Biol Phys 2008;72(3):770-6 | Seriecasos/cohorte/ENA |
| Leborgne F | Int J Radiat Oncol Biol Phys 2009;74(5):1441-6 | Duplicado |
| Lopez Guerra JL | Clin Transl Oncol 2013;15(4):271-7 | Seriecasos/cohorte/ENA |
| Lukka H, | J Clin Oncol 2005;23(25):6132-8 | Incluidoen RS |
| Macias V | Clin Transl Oncol 2009;11(7):437-45 | Revisión no sistemática |
| Martin JM | Int J Radiat Oncol Biol Phys 2007;69(4):1084-9 | Seriecasos/cohorte/ENA |
| Marzi S | J Exp Clin Cancer Res 2009;28:117 | Incluidoen RS |
| McDonald AM | Acta Oncol 2013;52(6):1181-8 | Seriecasos/cohorte/ENA |
| Miles EF | Semin Radiat Oncol 2008;18(1):41-7 | Revisión no sistemática |
| Norkus D | Medicina (Kaunas ) 2005;41(12):1035-41 | Lituano |
| Norkus D | Medicina (Kaunas ) 2009;45(6):469-75 | Duplicado |
| Norkus D | Strahlenther Onkol 2009;185(11):715-21 | Duplicado |
| Norkus D | Radiat Oncol 2013;8(1):206 | Incluidoen RS |
| Pahl R | Strahlenther Onkol 2012;188(9):841-2 | Alemán |
| Pollack A, | Int J Radiat Oncol Biol Phys 2006;64(2):518-26 | Duplicado |
| Pollack A | J Clin Oncol 2013 ;31(31):3860-8 | Incluidoen RS |
| Rene N | Int J Radiat Oncol Biol Phys 2010 ;77(3):805-10 | Seriecasos/cohorte/ENA |
| Sethukavalan P | Can J Urol 2012;19(2):6165-9 | Sin datosclínicos |
| Sharieff W | Technol Cancer Res Treat 2014 Apr 16 | Sin datosclínicos |
| Spyropoulou D | Oncol 2012;2012:410892 | Revisión no sistemática |
| Strigari L | Int J Radiat Oncol Biol Phys 2009;73(5):1454-60 | Incluidoen RS |
| Supiot S | Cancer Radiother 2013;17(5-6):349-54 | Revisión no sistemática |
| Szychot E | Ann Acad Med Stetin 2012;58(1):45-8 | Sin datosclínicos |
| Taneja SS | J Urol 2014;191(4):983-5 | Carta/comentario/abstact |
| Tang CI | Clin Oncol (R Coll Radiol ) 2008;20(10):729-37 | Seriecasos/cohorte/ENA |
| Teh BS | Lancet Oncol 2012;13(1):5-6 | Carta/comentario/abstact |
| Thomson D | Prostate Cancer 2012;2012:450246 | Seriecasos/cohorte/ENA |
| Toledano A | Prog Urol 2012 ;22(12):671-7 | Revisión no sistemática |
| Turaka A | Int J Radiat Oncol Biol Phys 2010;78(3 S):S67 | Carta/comentario/abstact |
| Vavassis P | Expert Rev Anticancer Ther 2012;12(7):965-72 | Revisión no sistemática |
| Viani GA | Radiat Oncol 2013;8:94 | Seriecasos/cohorte/ENA |
| Vogelius IR, | Int J Radiat Oncol Biol Phys 2011;80(1):316-7 | Carta/comentario/abstact |
| Vogelius IR | Int J Radiat Oncol Biol Phys 2013;85(1):89-94 | Control diferente/αβ |
| Wenz F. | Strahlenther Onkol 2009;185(11):722-3 | Carta/comentario/abstact |
| Wong WM | Rev Urol 2013;15(3):113-7 | Revisión no sistemática |
| Wu JS | Radiother Oncol 2012;103(2):210-6 | Seriecasos/cohorte/ENA |
| Yeoh EE | Int J Radiat Oncol Biol Phys 2003;55(4):943-55 | Duplicado |
| Yeoh EE | Int J Radiat Oncol Biol Phys 2006;66(4):1072-83 | Duplicado |
| Yeoh EE | Int J Radiat Oncol Biol Phys 2011;81(5):1271-8 | Incluidoen RS |
| Zilli T | Int J Radiat Oncol Biol Phys 2011;81(2):382-9 | Seriecasos/cohorte/ENA |
